# Supplementary material
Source: HighWire-hosted journal article supplement (http://dmd.aspetjournals.org/highwire/filestream/66613/field_highwire_adjunct_files/0/Supplemental_68270.pdf)

**RNA-Seq Quantification of Xenobiotic Processing Genes in Various Sections of the Intestine in Comparison to the Liver of Male Mice**

Zidong Donna Fu, Felcy Pavithra Selwyn, Julia Yue Cui, Curtis D. Klaassen

Journal: Drug Metabolism and Disposition









|         |             |             |             |           |           |           |             |             |             |             |             |             |             |             |             |
|---------|-------------|-------------|-------------|-----------|-----------|-----------|-------------|-------------|-------------|-------------|-------------|-------------|-------------|-------------|-------------|
| Slco4c1 | 0           | 0           | 0           | 0.0120109 | 0.0624617 | 0.0166205 | 0.00872933  | 0.00946254  | 0.0337586   | 0.0499057   | 0.012274    | 0.00934035  | 0.0245966   | 0           | 0           |
| Slco5a1 | 0.00501451  | 0           | 0.00594792  | 0.0577133 | 0.0566908 | 0.0377048 | 0.147091    | 0.0682053   | 0.0450265   | 0.0355783   | 0.0426503   | 0.13208     | 0.0920352   | 0.119046    | 0.0995221   |
| Slco6b1 | 0           | 0           | 0           | 0         | 0         | 0         | 0           | 0           | 0           | 0           | 0           | 0           | 0           | 0           | 0           |
| Slco6c1 | 0           | 0           | 0           | 0         | 0         | 0         | 0           | 0           | 0           | 0           | 0           | 0           | 0           | 0           | 0           |
| Slco6d1 | 0           | 0           | 0           | 0         | 0         | 0         | 0           | 0           | 0           | 0           | 0           | 0           | 0           | 0           | 0           |
| Sult1a1 | 84.3673     | 110.367     | 80.8189     | 3.12328   | 3.35259   | 2.21536   | 5.38415     | 4.16795     | 2.93904     | 3.10435     | 4.6499      | 3.84873     | 143.175     | 159.952     | 175.451     |
| Sult1b1 | 7.35117     | 5.55567     | 8.34921     | 100.498   | 108.826   | 141.757   | 45.167      | 86.2186     | 85.3669     | 89.794      | 75.8637     | 54.0488     | 40.8225     | 44.7049     | 34.5171     |
| Sult1c1 | 0           | 0           | 0           | 0         | 0         | 0.0137499 | 0           | 0           | 0.0139703   | 0           | 0           | 0           | 0.0270968   | 0.0284617   | 0           |
| Sult1c2 | 1.19685     | 1.23074     | 1.28424     | 1.56587   | 1.32865   | 6.78699   | 5.55999     | 1.20112     | 0.825792    | 1.63373     | 1.64019     | 3.10995     | 22.0972     | 20.9872     | 28.4034     |
| Sult1d1 | 27.6859     | 24.6978     | 30.683      | 86.6286   | 127.541   | 123.021   | 80.467      | 113.625     | 103.846     | 109.543     | 124.587     | 88.2383     | 61.3397     | 108.448     | 102.606     |
| Sult1e1 | 0.0576658   | 0.107008    | 0.0683285   | 0.0733975 | 0         | 0.0677314 | 0.159598    | 0.0963686   | 0.0344177   | 0.0901738   | 0.0748674   | 0.0761607   | 0.100034    | 0           | 0.044891    |
| Sult2a1 | 0           | 0           | 0           | 0         | 0         | 0         | 0           | 0           | 0           | 0           | 0           | 0           | 0           | 0           | 0           |
| Sult2a2 | 0.0735298   | 0           | 0           | 0         | 0         | 0.0322454 | 0           | 0           | 0           | 0           | 0           | 0           | 0           | 0           | 0           |
| Sult2a3 | 0           | 0           | 0           | 0         | 0         | 0         | 0           | 0           | 0           | 0           | 0           | 0           | 0           | 0           | 0           |
| Sult2a4 | 0.0264089   | 0.0244925   | 0           | 0         | 0         | 0         | 0           | 0           | 0           | 0           | 0           | 0           | 0           | 0           | 0           |
| Sult2a5 | 0           | 0           | 0           | 0         | 0         | 0         | 0           | 0           | 0           | 0           | 0           | 0           | 0           | 0           | 0           |
| Sult2a7 | 1.03862     | 0.347792    | 0.614962    | 0         | 0         | 0         | 0           | 0           | 0           | 0           | 0           | 0           | 0           | 0           | 0           |
| Sult2b1 | 0           | 0           | 0.128514    | 79.1189   | 70.9701   | 98.2944   | 52.6766     | 65.8128     | 62.0624     | 68.9612     | 86.3868     | 68.3363     | 15.7985     | 14.1122     | 10.8431     |
| Sult3a1 | 0           | 0           | 0           | 0         | 0         | 0         | 0           | 0           | 0           | 0           | 0           | 0           | 0           | 0           | 0           |
| Sult4a1 | 0           | 0.0175597   | 0.0112129   | 1.05013   | 0.715597  | 0.95207   | 1.66678     | 0.798798    | 1.18742     | 0.94176     | 0.814096    | 0.97622     | 2.24114     | 2.02869     | 2.71635     |
| Sult5a1 | 8.97529     | 7.28574     | 14.1446     | 0.107713  | 0.224068  | 0.0559147 | 0.156059    | 0.106067    | 0.246281    | 0.0868078   | 0.0823726   | 0.188636    | 0.238475    | 0.135186    | 0.173031    |
| Sult6b1 | 0.0110756   | 0           | 0.0393907   | 0.0847767 | 0.220438  | 0.0684359 | 0.195022    | 0.144709    | 0.17874     | 0.163021    | 0.173213    | 0.219785    | 0.221771    | 0.303275    | 0.413816    |
| Upmt    | 14.1071     | 11.1304     | 14.9104     | 3.86855   | 4.26927   | 4.03838   | 3.05676     | 3.53989     | 3.131       | 3.30545     | 2.79528     | 2.91425     | 3.98045     | 4.57614     | 4.77767     |
| Ugdh    | 70.4591     | 113.466     | 65.8846     | 102.747   | 151.796   | 137.512   | 50.5647     | 77.6189     | 90.1117     | 82.9587     | 68.7529     | 65.4104     | 93.9746     | 145.129     | 169.359     |
| Ugp2    | 83.8537     | 60.2071     | 78.9928     | 26.47     | 25.0875   | 29.9695   | 29.931      | 27.4404     | 23.962      | 27.0507     | 30.537      | 28.8613     | 44.4018     | 60.4899     | 52.8252     |
| Ugt1a1  | 110.928     | 69.8114     | 105.872     | 129.313   | 117.158   | 107.955   | 35.3989     | 90.9179     | 114.463     | 97.5393     | 55.331      | 34.9221     | 5.37395     | 10.0903     | 16.6145     |
| Ugt1a10 | 0.354771    | 0.427501    | 0.396039    | 0.630426  | 0.57626   | 0.585019  | 0.16331     | 0.283427    | 0.375091    | 0.322483    | 0.311343    | 0.147927    | 0.2505      | 0.265746    | 0.24585     |
| Ugt1a2  | 0.953719    | 0.519514    | 0.64301     | 0.135532  | 0.152075  | 0.315702  | 0.19966     | 0.0697119   | 0.261464    | 0.166156    | 0.172174    | 0.214679    | 0.0698425   | 0.180504    | 0.300773    |
| Ugt1a5  | 10.6541     | 5.03876     | 9.25923     | 0.0541034 | 0.0758991 | 0.118136  | 0.0181172   | 0.0596404   | 0.0186389   | 0.0296139   | 0.0982087   | 0.0779189   | 0.0309885   | 0.0235056   | 0.0428922   |
| Ugt1a6a | 32.7609     | 25.4784     | 28.7603     | 1.90021   | 3.36226   | 2.9499    | 2.10916     | 1.12159     | 1.194       | 0.874897    | 1.22813     | 2.01593     | 10.0762     | 21.4122     | 24.1494     |
| Ugt1a6b | 112.189     | 89.46       | 99.3568     | 7.04238   | 3.85019   | 28.2264   | 2.86235     | 1.85301     | 5.38985     | 1.70386     | 2.50615     | 3.75983     | 9.00733     | 15.749      | 22.3108     |
| Ugt1a7c | 0.203308    | 0.099549    | 0.180045    | 180.574   | 182.345   | 191.38    | 47.2641     | 105.1       | 133.457     | 106.017     | 80.1866     | 56.7694     | 72.5231     | 88.1038     | 95.8476     |
| Ugt1a9  | 11.7831     | 19.5755     | 19.5919     | 6.99727   | 10.8333   | 7.91514   | 0.161852    | 2.16668     | 3.2538      | 2.51133     | 0.614004    | 0.222351    | 0.0346276   | 0.0233524   | 1.09873E-07 |
| Ugt2a1  | 0.000436634 | 0.000404224 | 0.000519824 | 0.752181  | 0.790607  | 0.528851  | 0.000412913 | 0.000442615 | 0.000392748 | 0.648701    | 0.000568665 | 0.000434343 | 0.000382442 | 0.349244    | 0.000509321 |
| Ugt2a2  | 0.819234    | 0.658588    | 0.725209    | 0.193949  | 0.349323  | 0.346066  | 0.265778    | 0.7318      | 0.736784    | 0.000157636 | 0.420622    | 0.283893    | 0.253343    | 0.000998034 | 0.283827    |
| Ugt2a3  | 117.998     | 98.6039     | 104.754     | 87.1265   | 89.3787   | 89.206    | 9.80781     | 63.039      | 71.4737     | 66.8133     | 24.6133     | 8.67954     | 0.85575     | 1.05326     | 0.828893    |
| Ugt2b1  | 255.153     | 300.705     | 269.958     | 0.179974  | 0.0818948 | 0.241259  | 0.0654122   | 0.0531712   | 0.0711303   | 0.0830995   | 0.0689765   | 0.017494    | 0.046075    | 0.273481    | 0.0308642   |
| Ugt2b34 | 191.029     | 144.417     | 178.259     | 300.988   | 333.924   | 319.313   | 122.091     | 205.895     | 230.208     | 193.066     | 158.261     | 131.62      | 113.809     | 124.24      | 109.114     |
| Ugt2b35 | 101.551     | 93.551      | 100.597     | 31.1906   | 35.8163   | 35.8022   | 11.1778     | 14.7975     | 19.5879     | 14.1465     | 8.48557     | 10.4414     | 10.3685     | 8.81934     | 8.11436     |
| Ugt2b36 | 315.507     | 285.586     | 301.932     | 10.7174   | 10.7201   | 12.8838   | 8.06219     | 7.38183     | 8.69838     | 7.98057     | 8.73029     | 8.2794      | 0.466555    | 1.04706     | 1.22883     |
| Ugt2b37 | 28.8016     | 28.2316     | 25.207      | 1.84826   | 2.60519   | 2.61702   | 0.611708    | 0.567071    | 0.677962    | 0.617105    | 0.358489    | 0.628618    | 0.106667    | 0.489368    | 0.636808    |
| Ugt2b38 | 77.756      | 76.5882     | 77.9911     | 4.90102   | 6.59283   | 7.30734   | 1.58654     | 1.52665     | 2.18734     | 1.54165     | 1.16746     | 1.65312     | 0.334254    | 1.1612      | 1.63689     |
| Ugt2b5  | 477.838     | 409.612     | 450.305     | 39.5653   | 44.1449   | 48.3913   | 10.9257     | 10.0184     | 15.1967     | 10.543      | 7.77023     | 10.8332     | 1.72494     | 6.77068     | 10.2165     |
| Ugt3a1  | 54.4251     | 37.3824     | 54.3204     | 0.0835467 | 0         | 0.0177866 | 0           | 0           | 0           | 0           | 0           | 0           | 0           | 0           | 0           |
| Ugt3a2  | 137.334     | 108.35      | 134.929     | 0.0725046 | 0         | 0.0912123 | 0.00957849  | 0.0103856   | 0           | 0           | 0.0134691   | 0           | 0.00899727  | 0.0565806   | 0           |
| Ugt8a   | 0.0244052   | 0           | 0.0434123   | 0.031178  | 0.0648548 | 0.231873  | 0.0113403   | 0.0184226   | 0.0164251   | 0.0288082   | 0.0159404   | 0.0484792   | 0.106475    | 0.150394    | 0.320551    |

# Supplemental Figure S1A

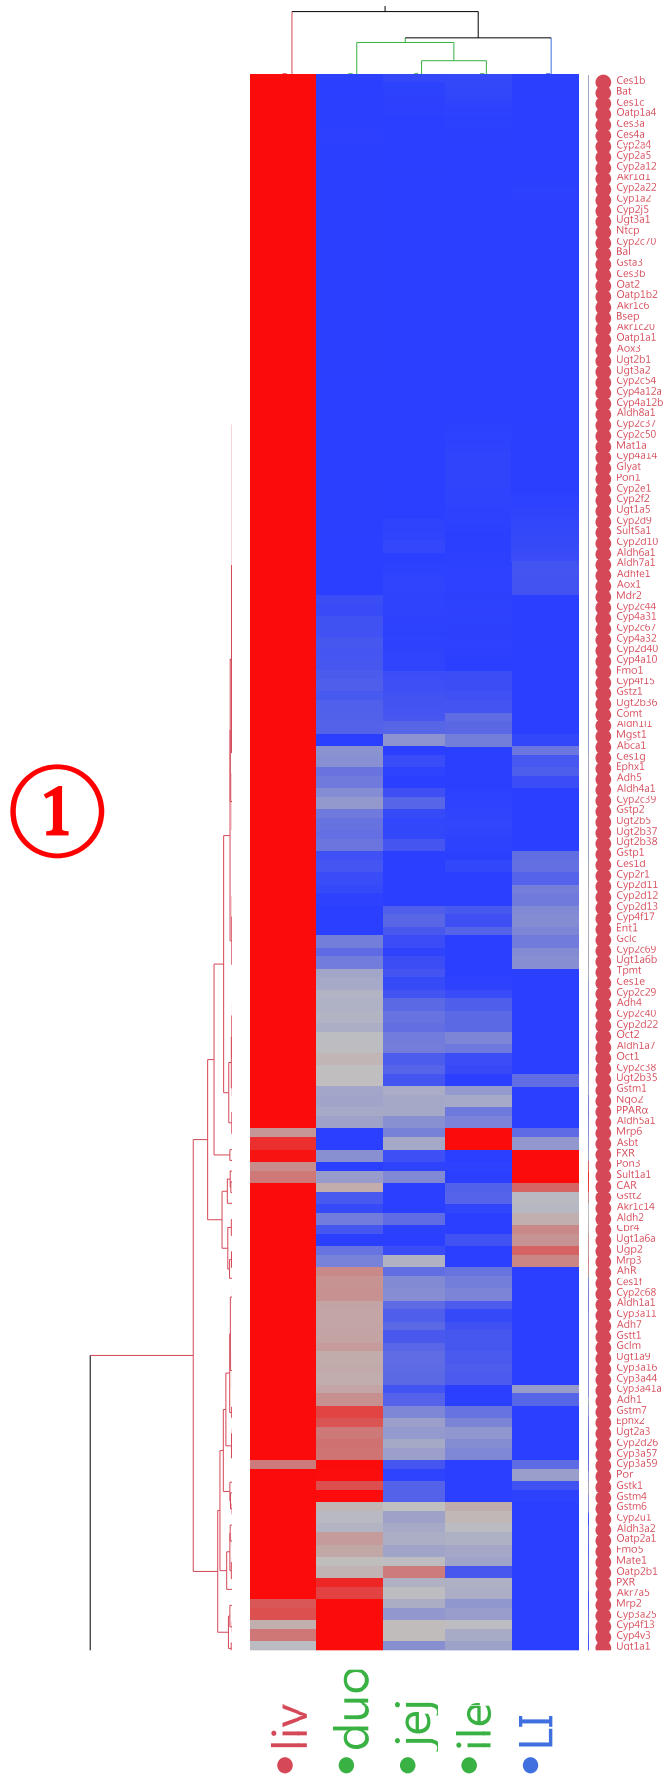

# Supplemental Figure 1B

2

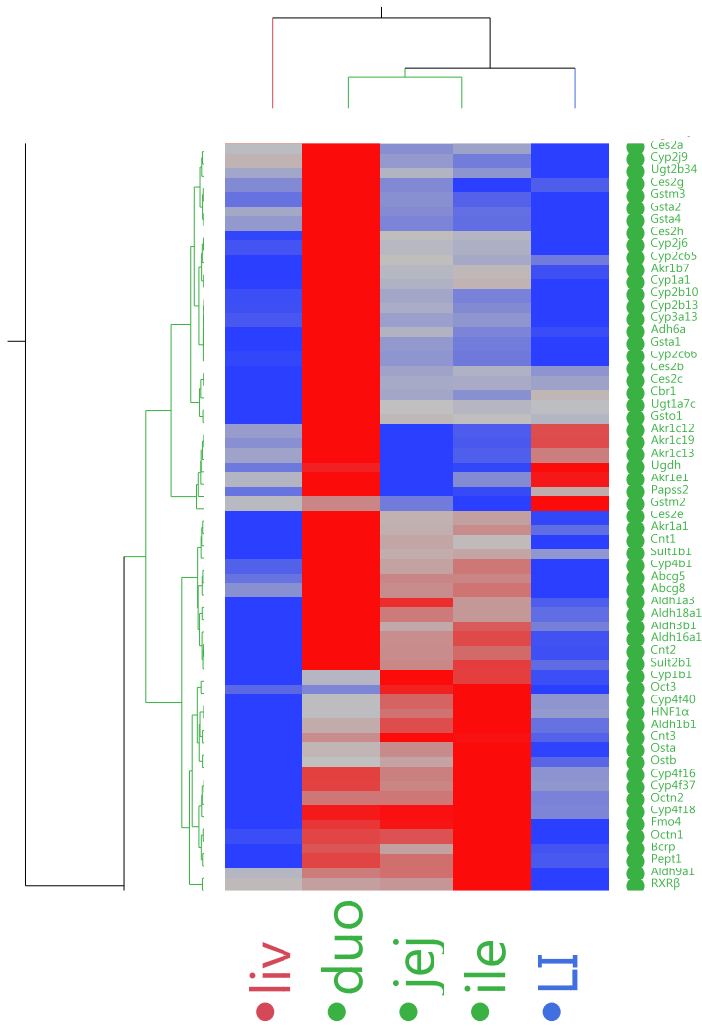



# Supplemental Figure 1C

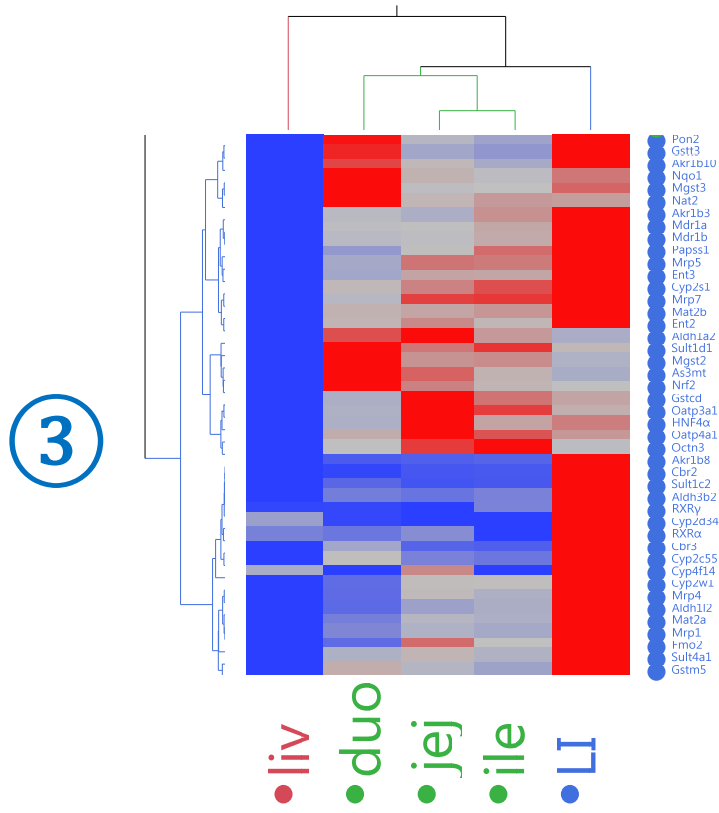

Supplement: Supplemental_68270.pdf [file Supplemental_68270.pdf]
